# Supplementary material for: Barriers and Facilitators to Intradialytic Parenteral Nutrition Implementation Targeting Protein Energy Wasting in Malaysian Hemodialysis Patients
Source: MDPI journal article supplement (doi:10.3390/healthcare10102090), 2022-10-20
Supplement: s1 [file s1]

**A Survey on Intradialytic Parenteral Nutrition (IDPN) Practice at Malaysian Hospitals  
Haemodialysis (HD) Centres**

Name: \_\_\_\_\_ Hospital: \_\_\_\_\_

**A. Demographics of IDPN practice**

1. Type of Hospital: ☐ Government ☐ University ☐ Private

2. Is there a Nephrologist (Renal Specialist) at your centre?

☐ Yes ☐ No

If Yes please state the number: \_\_\_\_\_

3. Total number of patients at your HD centre?: \_\_\_\_\_

4. Does the Nephrologist prescribe IDPN for outpatient HD patients at the hospital?

☐ Yes ☐ No

**B. IDPN Use by Prescribers and Stakeholders**

**May tick more than one.**

5. Patients who are prescribed on IDPN by the doctor are usually

☐ warded patients

☐ outpatients

6. Who determines to start or initiate IDPN at your hospital?

☐ Nephrologist/Doctor

☐ Nurse

☐ Pharmacist

☐ Dietitian

☐ Others please specify \_\_\_\_\_

7. Who selects or determines the IDPN bag to be used in patients?

☐ Doctor

☐ Pharmacist

☐ Dietitian

8. IDPN bags are provided as

☐ compounded bags by hospital pharmacy

☐ standard 3 chamber bags

☐ lipid-free standard bags

☐ others please specify \_\_\_\_\_

9. Which of the following IDPN bag is commonly prescribed for your patients?

- ☐ Nutriflex lipid special
- ☐ Kabiven Peri & central
- ☐ Nutriflex lipid peri & plus
- ☐ Smof Kabiven
- ☐ Others please specify \_\_\_\_\_

10. Is compounding individualized IDPN bag common ( $\geq 50\%$  of IDPN prescribed at the HD unit are compounded regimes) for patients at your centre?

**(If yes proceed to question 11 , if No proceed to question 12)**

- ☐ Yes ☐ No

11. Why is compounding preferred compared to standard formula for IDPN bag?

\_\_\_\_\_

### C. IDPN prescription and delivery

**May tick more than one.**

12. Which of these markers are used as a criteria by the nephrologist before initiating IDPN?

- ☐ BMI  $< 23 \text{ kg/m}^2$
- ☐ serum albumin  $< 38 \text{ g/L}$
- ☐ weight loss of 10% over 6 months
- ☐ dietary intake  $< 25 \text{ kcal/kg/day}$
- ☐ others please specify \_\_\_\_\_

13. IDPN is recommended when maintenance HD patients have at least  $20 \text{ kcal/kg/day}$  of established oral spontaneous intake. **Is this true?**

- ☐ Yes ☐ No

14. Is there specific IDPN prescribing protocol in place at your centre?

eg. specific IDPN order form ☐ Yes ☐ No

15. Who calculates the macronutrients (carbohydrate, protein and lipid) prescribed to patients on IDPN?

- ☐ Nurse
- ☐ Doctor
- ☐ Pharmacist
- ☐ Dietitian
- ☐ No calculation, use standard formula

16. Who administers IDPN at your HD centre?

- ☐ Nurse
- ☐ Doctor
- ☐ Medical Assistant
- ☐ Patient
- ☐ Others please specify \_\_\_\_\_

17. How many hours is IDPN administered in HD patients at your centre?

- ☐ 3.5 hours or less
- ☐ 4 hours
- ☐ 6 hours
- ☐ 12 hours
- ☐ 24 hour
- ☐ Others please specify \_\_\_\_\_

18. What are other infusions commonly given concurrently with IDPN?

- ☐ IV saline
- ☐ IV Antibiotics (e.g. IV Vancomycin)
- ☐ IV Iron
- ☐ Blood products
- ☐ Insulin
- ☐ None
- ☐ Others please specify \_\_\_\_\_

19. Are there drug or blood products infusions given via the same IV line as IDPN?

- ☐ Yes    ☐ No
- ☐ If yes, please specify drug/blood product given \_\_\_\_\_

#### D. IDPN Monitoring & Evaluation of treatment

May tick more than one.

20. Are baseline biochemical parameters done **before commencing** IDPN at your centre? (if yes, please proceed to question 21)

- ☐ Yes                      ☐ No

21. Which are the routine biochemical test done on outpatient HD patients while on IDPN?

- |                                               |                                              |
|-----------------------------------------------|----------------------------------------------|
| <input type="checkbox"/> Serum electrolytes   | <input type="checkbox"/> Total cholesterol   |
| <input type="checkbox"/> Liver function tests | <input type="checkbox"/> Serum triglycerides |
| <input type="checkbox"/> Renal function tests | <input type="checkbox"/> Total bilirubin     |
| <input type="checkbox"/> Blood glucose levels | <input type="checkbox"/> Dextrostix          |
| <input type="checkbox"/> Serum Albumin        | <input type="checkbox"/> Hemoglobin          |

- ☐ CRP
- ☐ Serum Iron

- ☐ Fluid status

22. What are the common complications reported in IDPN patients.

- |                                                |                                               |
|------------------------------------------------|-----------------------------------------------|
| <input type="checkbox"/> Fever                 | <input type="checkbox"/> Hypotermia           |
| <input type="checkbox"/> Hypotension           | <input type="checkbox"/> Hyperglycemia        |
| <input type="checkbox"/> Electrolyte imbalance | <input type="checkbox"/> Sepsis               |
| <input type="checkbox"/> IV line infection     | <input type="checkbox"/> Thrombophlebitis     |
| <input type="checkbox"/> Hepatic Steatosis     | <input type="checkbox"/> Hypertriglyceridemia |
| <input type="checkbox"/> Hypercholesterolemia  | <input type="checkbox"/> Refeeding Syndrome   |
| <input type="checkbox"/> Fluid overload        |                                               |

#### **E. Pharmacists role and tasks in IDPN delivery**

**May tick more than one.**

23. Does the dialysis center have access to a pharmacist/dietitian?

- ☐ Yes, full time pharmacist only
- ☐ Yes, full time dietitian only
- ☐ Yes, both
- ☐ No

24. Are you aware of Protein Energy Wasting (PEW) in CKD patients?

- ☐ Yes
- ☐ No

25. Did you receive any formal training or continuous medical education on managing PEW patients on HD?

- ☐ Yes
- ☐ No

Thank you for your time!
